# Supplementary material for: RNA-Seq analysis identifies genes associated with differential reproductive success under drought-stress in accessions of wild barley Hordeum spontaneum
Source: PubMed Central journal article supplement (PMC4459662; doi:10.1186/s12870-015-0528-z), 2015-06-09

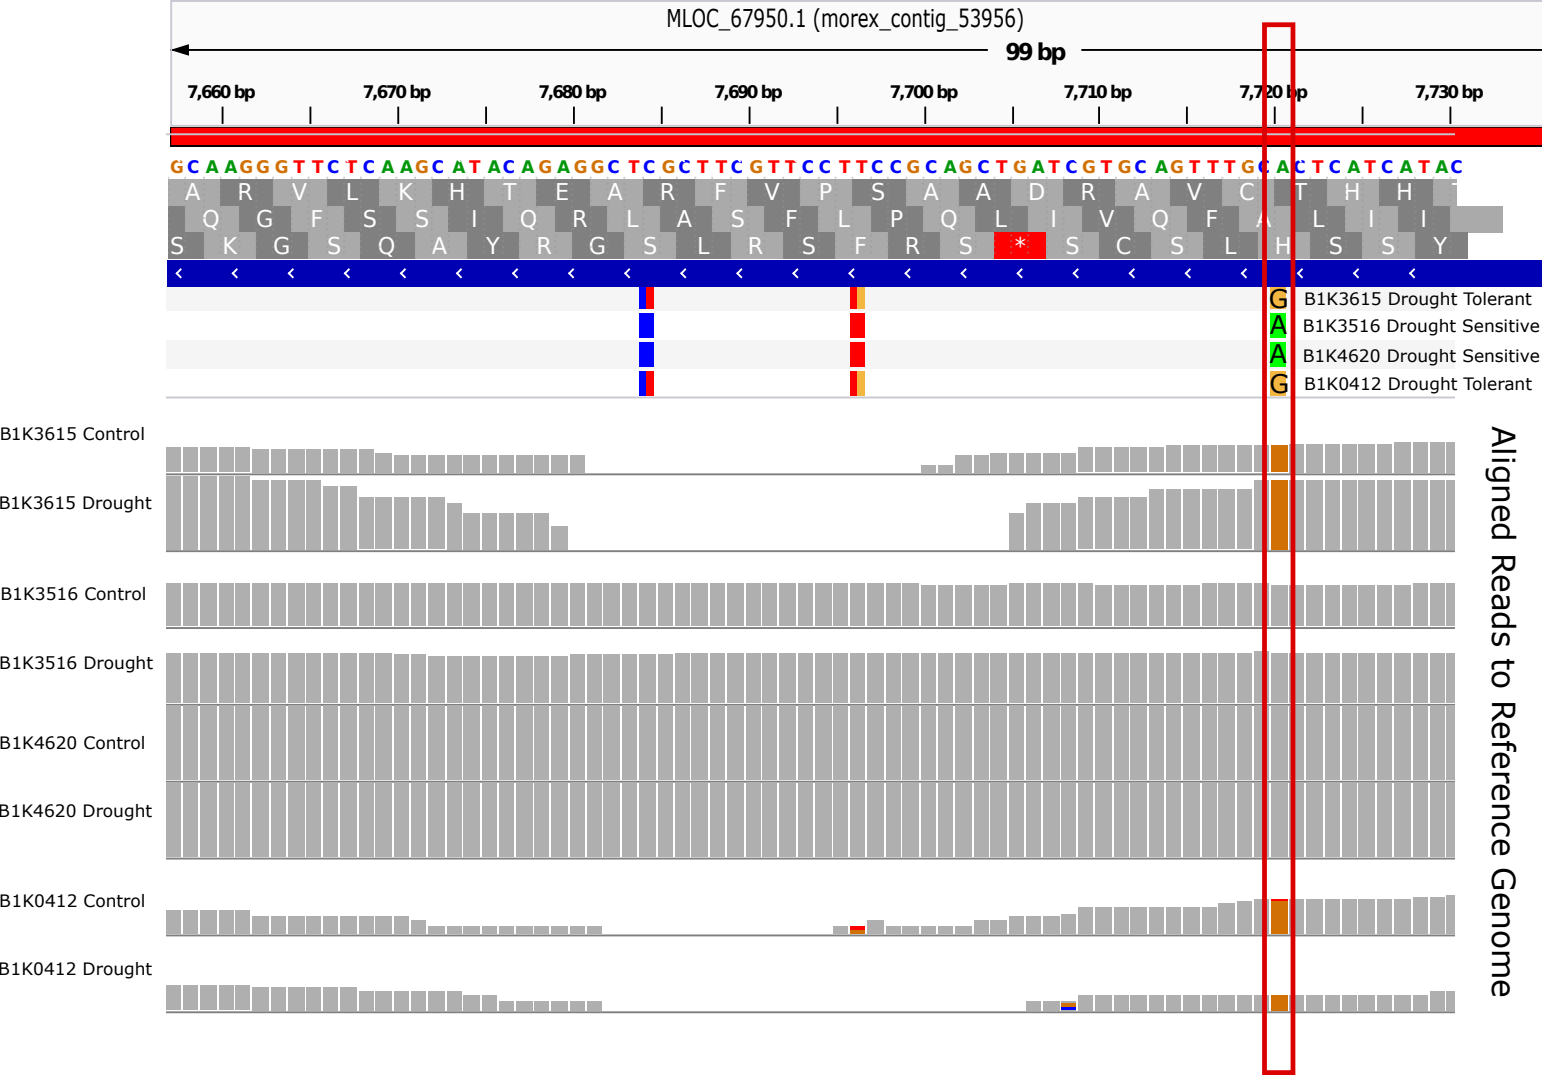

Supplement: 12870_2015_528_MOESM7_ESM.pdf [file 12870_2015_528_MOESM7_ESM.pdf]
